# Supplementary material for: Intracellular degradation of functionalized carbon nanotube/iron oxide hybrids is modulated by iron via Nrf2 pathway
Source: PubMed Central journal article supplement (PMC5264386; doi:10.1038/srep40997), 2017-01-25
Supplement: srep40997-s1.pdf [file srep40997-s1.pdf]

## Intracellular degradation of functionalized carbon nanotube/iron oxide hybrids is modulated by iron via Nrf2 pathway

Dan Elgrabli<sup>1\*</sup>, Walid Dachraoui<sup>2</sup>, H  l  ne de Marmier<sup>1</sup>, C  cilia M  nard-Moyon<sup>3</sup>, Dominique B  gin<sup>4</sup>, Sylvie B  gin<sup>5</sup>, Alberto Bianco<sup>3</sup>, Damien Alloyeau<sup>2</sup> and Florence Gazeau<sup>1\*</sup>

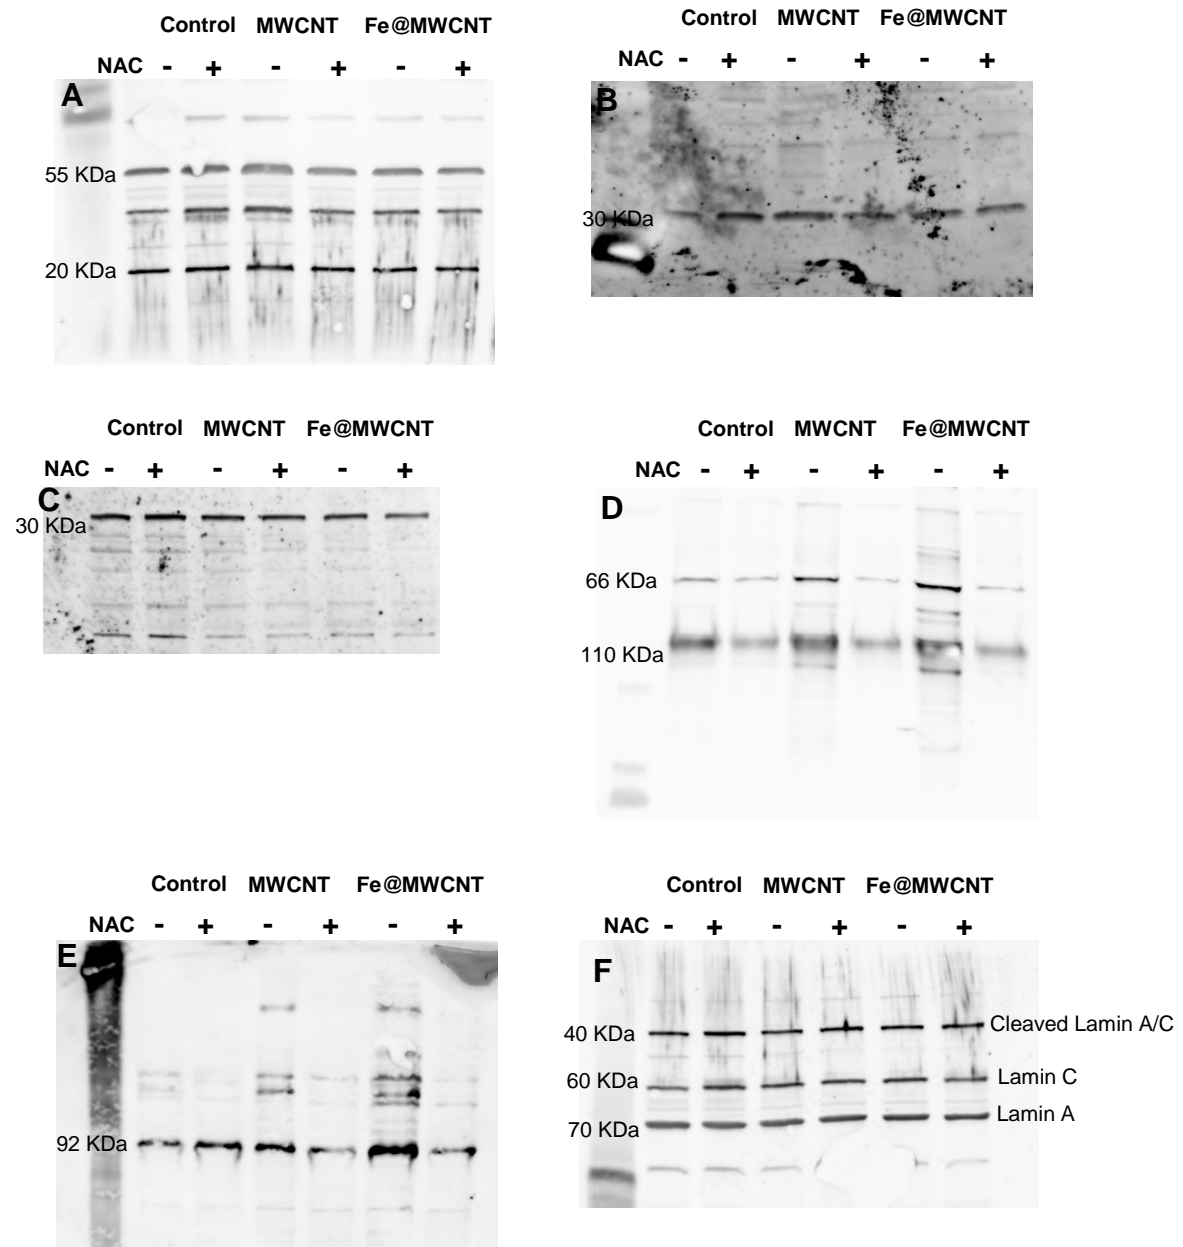

Fig S1: **Full western blots.** Ferritin H (A), Hmox1 (B), RPL19 (C), Nrf2 (D), Bach1 (E), Lamin A (F) full western blots corresponding to cropped blots displayed in fig 2 (Ferritin H, Hmox1 and RPL19), fig 3C (Nrf2 and lamin A) and fig 4C (Bach 1 and Lamin A). The commercial antibody from Santa Cruz Biotechnology for Nrf2 detect two bands at 66 and 110 kDa as observed in our experiment.
